# Supplementary material for: Occurrence and Molecular Study of Hypermucoviscous/Hypervirulence Trait in Gut Commensal K. pneumoniae from Healthy Subjects
Source: MDPI journal article supplement (doi:10.3390/microorganisms11030704), 2023-03-09
Supplement: s1 [file s1]

## Supplementary Materials

**Table S1.** DNA sequences of oligonucleotide PCR primers.

| Target gene and function                                                                                                                  | Sequence (5' – 3')                                            | Amplicon size (bp) | Ta <sup>1</sup> / extension time | Source |
|-------------------------------------------------------------------------------------------------------------------------------------------|---------------------------------------------------------------|--------------------|----------------------------------|--------|
| <i>magA</i> : mucoviscosity associated gene A: (serotype K1); for capsular serotyping                                                     | F: GGTGCTCTTTACATCATTGC<br>R: GCAATGGCCATTTGCGTTAG            | 1283 bp            | 53 °C / 90 s                     | [35]   |
| capsular serotype K2 gene ( <i>wzy</i> ): plays a vital role in the synthesis of the lipopolysaccharide (LPS); for capsular serotyping    | F: GACCCGATATTCATACTTGACAGAG<br>R: CCTGAAGTAAATCGTAAATAGATGGC | 641 bp             | 57 °C / 50 s                     | [35]   |
| <i>kfuBC</i> : uptake of ferric iron                                                                                                      | F: GAAGTGACGCTGTTTCTGGC<br>R: TTTCGTGTGGCCAGTGACTC            | 797 bp             | 57 °C / 1 min                    | [35]   |
| <i>entB</i> : enterobactin                                                                                                                | F: GATGAAGACGATACCGTGC<br>R: ACCGAATCCAGACCGTAGTC             | 389 bp             | 53 °C / 30 s                     | [36]   |
| <i>iroB</i> : salmochelin siderophore biosynthesis                                                                                        | F: ATCTCATCATCTACCCTCCGCTC<br>R: GGTTCCGCCGTCTTTTCAA          | 235 bp             | 59 °C / 30 s                     | [36]   |
| <i>irp2</i> : yersiniabactin siderophore biosynthesis                                                                                     | F: GCTACAATGGGACAGCAACGAC<br>R: GCAGAGCGATACGGAAAATGC         | 230 bp             | 59 °C / 30 s                     | [36]   |
| <i>terW</i> : tellurite resistance (pLVPK-derived genetic loci)                                                                           | F: ATGCAATTAAACACCAGACAG<br>R: CTCATTCTCTTGAGTGTTC            | 239 bp             | 51 °C / 30 s                     | [37]   |
| <i>wabG</i> : involved in the biosynthesis of the outer core lipopolysaccharide                                                           | F: ACCATCGGCCATTTGATAGA<br>R: CGGACTGGCAGATCCATATC            | 683 bp             | 56 °C / 50 s                     | [38]   |
| <i>uge</i> : uridine diphosphate galacturonate 4-epimerase, responsible for the biosynthesis of the capsule and smooth lipopolysaccharide | F: TCTTCACGCCTTCCTTCACT<br>R: GATCATCCGGTCTCCCTGTA            | 534 bp             | 57 °C / 40 s                     | [38]   |
| <i>iucA</i> : aerobactin                                                                                                                  | F: AATCAATGGCTATTCCCGCTG<br>R: CGCTTCACTTCTTCACTGACAGG        | 239 bp             | 59 °C / 30 s                     | [36]   |
| <i>rmpA</i> : extracellular polysaccharide synthesis                                                                                      | F: ACTGGGCTACCTCTGCTTCA<br>R: CTTGCATGAGCCATCTTTCA            | 535 bp             | 57 °C / 50 s                     | [35]   |
| <i>rmpA2</i> : extracellular polysaccharide synthesis                                                                                     | F: GTGCAATAAGGATGTTACATTA<br>R: GGATGCCCTCCTCCTG              | 430 bp             | 50 °C / 40 s                     | [36]   |

<sup>1</sup> Ta: annealing temperature.
